# Supplementary material
Source: publisher site journal article supplement (https://www.dovepress.com/article/373449)
Supplement: Supplementary file 1 [file get_supplementary_file.php]

Supplementary file-English version data collection tools

Section I: Socio-demographic characteristics

| No. | Question | Response |
| --- | --- | --- |
| Q101 | Age (in years): |  |
| Q102 | Gender | 1. Male 2. Female |
| Q103 | Marital status | 1. Single 2. Married 3. Divorced 4. Widowed |
| Q104 | Residence | 1. Urban 2. Rural |
| Q105 | How many people live in your household? |  |
| Q106 | Employment status | 1. Unemployed 2. Government employed 3. Private employed |
| Q107 | Occupation |  |
| Q108 | Last grade of school completed: |  |
| Q109 | Monthly income |  |

Part II: Diabetes and other medical histories

| Q201 | How long have you had diabetes or year diagnosed? | | __________years |  |
| --- | --- | --- | --- | --- |
| Q202 | Does anyone else who lives with you have diabetes? (father, mother, brother, and sister) | | 1. 1. Yes 2. No   2. Don't Know |  |
| Q203 | What treatment are you taking right now? | | 1. Oral therapy 2. Insulin 2. Both | To be confirmed from pt card |
| Q204 | Do you have a home glucometer? | | 1. Yes 2. No |  |
| Q205 | Have you ever encountered DM complications? | | 1. Yes 2. No | To be confirmed from pt card |
| Q206 | | Do you have any co-morbidity? | 1. Yes 2. No | To be confirmed from pt card |
| Q207 | | Have you ever attended a DM education? | 1. Yes 2. No | If no skip to Q210 |
| Q208 | | Are you a member of the diabetes association? | 1. Yes 2. No |  |
| Q209 | | Have you ever discussed with health professionals about diabetes self-care? | 1. Yes 2. No |  |
| Q210 | | Can you list diabetes self-care practices expected from diabetic patients? | 1. Yes 2. No | If no skip to Q215 |
| Q211 | | How the cost of diabetic care is paid? | 1. Free 2. Out of pocket payment 3. Insurance 4. Others specify)___________ |  |

Part III: Diabetes Knowledge Test (DKT2)*

| S.no | Question | Response |
| --- | --- | --- |
| Q301 | The diabetes diet is: | 1. The way most Ethiopian people eat 2. A healthy diet for most people 3. Too high in carbohydrate for most people 4. Too high in protein for most people |
| Q302 | Which of the following is highest in carbohydrates? | 1. Baked chicken 2. Swiss cheese 3. Baked potato 4. Peanut butter |
| Q303 | Which is the best method for home glucose testing? | 1. Urine testing 2. Blood testing 3. Both are equally good |
| Q304 | What effect does unsweetened fruit juice have on blood glucose? | 1. Lowers it 2. Raises it 3. Has no effect |
| Q305 | Which should not be used to treat low blood glucose? | 1. 3 hard candies 2. 1/2 cup orange juice 3. 1 cup diet soft drink 4. 1 cup skim milk |
| Q306 | For a person in good control, what effect does exercise have on blood glucose? | 1. Lowers it 2. Raises it 3. Has no effect |
| Q307 | What effect will an infection most likely have on blood glucose? | 1. Lowers it 2. Raises it 3. Has no effect |
| Q308 | The best way to take care of your feet is to: | 1. Look at and wash them each day 2. Massage them with alcohol each day 3. Soak them for 1 hour each day 4. Buy shoes a size larger than usual |
| Q309 | Eating foods lower in fat decreases your risk for: | 1. Nerve disease 2. Kidney disease 3. Heart disease 4. Eye disease |
| Q310 | Numbness and tingling may be symptoms of: | 1. Kidney disease 2. Nerve disease 3. Eye disease 4. Liver disease |
| Q311 | Which of the following is usually not associated with diabetes? | 1. Vision problems 2. Kidney problems 3. Nerve problems 4. Lung problems |
| Q312 | You realize just before lunch that you forgot to take your insulin at breakfast. What should you do now? | 1. Skip lunch to lower your blood glucose 2. Take the insulin that you usually take at breakfast 3. Take twice as much insulin as you usually take at breakfast 4. Check your blood glucose level to decide how much insulin to take |
| Q313 | High blood glucose may be caused by: | 1. Not enough insulin 2. Skipping meals 3. Delaying your snack 4. Skipping your exercise |
| Q314 | A low blood glucose reaction may be caused by: | 1. Heavy exercise 2. Infection 3. Overeating 4. Not taking your insulin |

Part IV: Social Support

The following questions are about how much support you can count on from people around you.
People sometimes look to others for companionship, assistance, or other types of support. How often is each of the following kinds of support available to you if you need it?

*Please circle one number on each line*

| No. | Elements | None of the time | A little of the time | Some of the time | Most of the time | All of the time |
| --- | --- | --- | --- | --- | --- | --- |
| Q401 | Someone you can count on to listen to you when you need to talk | 1 | 2 | 3 | 4 | 5 |
| Q402 | Someone to give you good advice about a problem | 1 | 2 | 3 | 4 | 5 |
| Q403 | Someone to take you to the doctor if you need it | 1 | 2 | 3 | 4 | 5 |
| Q404 | Someone to have a good time with | 1 | 2 | 3 | 4 | 5 |
| Q405 | Someone to help you with daily chores if you are sick | 1 | 2 | 3 | 4 | 5 |
| Q406 | Someone to love and make you feel wanted | 1 | 2 | 3 | 4 | 5 |

Part V: The Summary of Diabetes Self-Care Activities#

The questions below ask you about your diabetes self-care activities during the past 7 days. If you were sick during the past 7 days, please think back to the last 7 days that you were not sick

| Code | Questions | Number of days | | | | | | | | |  | | |
| --- | --- | --- | --- | --- | --- | --- | --- | --- | --- | --- | --- | --- | --- |
| 0 | | 1 | 2 | 3 | | 4 | 5 | | 6 | | 7 |
| Diet | | | | | | | | | | | | | |
| Q501 | How many of the last SEVEN DAYS have you followed a healthful eating plan?(healthful eating means avoiding high sugar foods and high-fat foods, having regular meal pattern) |  | |  |  |  | |  |  | |  | |  |
| Q502 | On how many of the last SEVEN DAYS did you eat five or more servings of fruits and vegetables? |  | |  |  |  | |  |  | |  | |  |
| Q503 | On how many of the last SEVEN DAYS did you eat high-fat foods such as red meat or full-fat dairy products? |  | |  |  |  | |  |  | |  | |  |
| Q504 | On how many of the last SEVEN DAYS did you space carbohydrates evenly through the day? |  | |  |  |  | |  |  | |  | |  |
| Exercise | | | | | | | | | | | | | |
| Q505 | On how many of the last SEVEN DAYS did you participate in at least 30 minutes of physical activity? (Total minutes of continuous activity, including walking). |  | |  |  |  |  | |  |  | |  | |
| Q506 | On how many of the last SEVEN DAYS did you participate in a specific exercise session (such as swimming, walking, biking) other than what you do around the house or as part of your work? |  | |  |  |  |  | |  |  | |  | |
| Blood Sugar Testing | | | | | | | | | | | | | |
| Q507 | On how many of the last SEVEN DAYS did you test your blood sugar? |  | |  |  |  |  | |  |  | |  | |
| Q508 | On how many of the last SEVEN DAYS did you test your blood sugar the number of times recommended by your health care provider? |  | |  |  |  |  | |  |  | |  | |
| Foot Care | | | | | | | | | | | | | |
| Q509 | On how many of the last SEVEN DAYS did you check your feet? |  | |  |  |  |  | |  |  | |  | |
| Q510 | On how many of the last SEVEN DAYS did you inspect the inside of your shoes? |  | |  |  |  |  | |  |  | |  | |
| Q511 | On how many of the last SEVEN DAYS did you wash your feet? |  | |  |  |  |  | |  |  | |  | |
| Q512 | On how many of the last SEVEN DAYS did you soak your feet? |  | |  |  |  |  | |  |  | |  | |
| Q513 | On how many of the last SEVEN DAYS did you dry between your toes after washing? |  | |  |  |  |  | |  |  | |  | |
| Medications | | | | | | | | | | | | | |
| Q514 | On how many of the last SEVEN DAYS did you take your recommended insulin injections? |  | |  |  |  |  | |  |  | |  | |
| Q515 | On how many of the last SEVEN DAYS did you take your recommended number of diabetes pills? |  | |  |  |  |  | |  |  | |  | |
| Smoking and alcoholism | | | | | | | | | | | | | |
| Q516 | Have you smoked a cigarette—even one puff—during the past SEVEN DAYS? | | 1. Yes 2. No  (if no skip to Q521B) | | | | | | | | | | |
| Q517 | If yes, how many cigarettes did you smoke on an average day? The number of cigarettes: | | Number of sticks _______________ | | | | | | | | | | |
| Q518 | At your last doctor’s visit, did anyone ask about your smoking status? | | 1. Yes 2. No | | | | | | | | | | |
| Q519 | If you smoke, at your last doctor's visit, did anyone counsel you about stopping smoking or offer to refer you to a stop-smoking program? | | 1. Yes 2. No | | | | | | | | | | |
| Q520A | When did you last smoke a cigarette? | | 1. One to two years ago 2. Four to twelve months ago 3. One to three months ago 4. Within the last month 5. Today | | | | | | | | | | |
| Q521B | Have you drunk alcohol for the last SEVEN DAYS? | | 1. Yes 2. No | | | | | | | | | | |
| Q522 | If your answer for Q521B is ‘yes’ how much alcohol (in bottles or glasses) do you drink per day? | | Number of bottles _________  OR  Number of glasses: ______________ | | | | | | | | | | |

Thank you very much!

English version of interview guide for type 2 diabetes mellitus patients of the study entitled, “Self-care practice and associated factors among patients with type 2 diabetes mellitus at a referral hospital in Northern Ethiopia – a mixed methods study”.

1. How do describe your current situation with regard to the diabetes?
2. What do you do to control your diabetes (diet, physical exercise, foot care, blood glucose monitoring, medication adherence)?
3. Among the aforementioned domains of self-care, which do you think is poorly practiced? Why?
4. In general, what things do you think prohibit you performing the recommended diabetes self-care?
5. Is there anything you would like to add?

Thank you very much!

**Notes:** *The DKT survey instrument was used with permission the Michigan Diabetes Research Center (MDRC), the project described was supported by Grant Number P30DK020572 (MDRC) from the National Institute of Diabetes and Digestive and Kidney Diseases. © University of Michigan, 2015.9 #The SDSCA measure was used with permission from the Oregon Research Institute. SDSCA Copyright 2000 Oregon Research Institute, Eugene, Oregon. All rights reserved.10
